# Supplementary material
Source: PubMed Central journal article supplement (PMC3067873)
Supplement: supp_85_7_3142__1.pdf [file supp_85_7_3142__1.pdf]

**Supplementary Figure 3. APOBEC3H G105R genotyping assay.**

Primers for the assay (melting temperature followed by sequence)

Forward primer: 71.0°C CATGGGACTGGACGAAGCGCA

Reverse primer: 72.3°C TGGGATCCACACAGAAGCCGCA

Underlined base in the forward primer creates a HhaI internal digestion control in the amplicon (no naturally occurring site exists nearby).

exon 3 (second coding exon)

```

                CATGGGACTGGACGAAGCGCA
AACGAGATCAAGTCCATGGGACTGGACGAAACGCAGTGCTACCAAGTCACCTGTTACCTC
 N E I K S M G L D E T Q C Y Q V T C Y L
61
ACGTGGAGCCCCTGCTCCTCCTGTGCCTGGGAGCTGGTTGACTTCATCAAGGCTCACGAC
 T W S P C S S C A W E L V D F I K A H D
81
                C
CATCTGAACCTGGGCATCTTCGCCTCCCGCCTGTACTACCACTGGTGCAAGCCCCAGCAG
 H L N L G I F A S R L Y Y H W C K P Q Q
101                R                120

        3-ACGCCGAAGACACACCTAGGGTCC-5'
AAGGGGCTGCGGCTTCTGTGTGGATCCCAGGTCCCGGTGGAGGTCATGGGCTTCCCAGgt
 K G L R L L C G S Q V P V E V M G F P E
121                140
```

Assay is based upon the HhaI restriction enzyme (recognition sequence GCGC).

Expected sizes for the G105R genotyping assay.

| Uncut | 105G/105G | 105G/105R | 105R/105R |
|-------|-----------|-----------|-----------|
| 197   |           |           |           |
|       | 180       | 180       |           |
|       |           | 102       | 102       |
|       |           | 78        | 78        |
|       | 17        | 17        | 17        |

Assay notes: The amplified region is GC-rich (60.9%), so PCRs are conducted with 1 M betaine included. The primers have relatively high Tm's, so annealing and extension can be done at the same temperature (that is, 72°C).

**Supplemental Figure 4. APOBEC3H K121D genotyping assay.**

Primers for the assay (melting temperature followed by the sequence)

Forward primer: 59.8°C CCACGCACTAGAAAGTTCACC

Reverse primer: 60.5°C GGTTGCACTCTTATAACTGCAAAG

CCACGCACTAGAAAGTTCACC

ctgtataaaccagggaaggcaggaagcggggtgcttgccctgcactaggccaggccacgcactagaaagtccaccgga

cagaccctctgccccccatccccgccccgctcccgccccgccccagtcacatgactcctggcctctctcttc

exon 3 (second coding exon)

tcccctcccttctctctgtttgggaccctccccagAAAAAGTGCCATGCAGAAATTTGCTTTATTAACGAGATCAAG

K K C H A E I C F I N E I K

51

TCCATGGGACTGGACGAAACGCAGTGCTACCAAGTCACCTGTTACCTCACGTGGAGCCCCTGCTCCTCCTGTGCCTG

S M G L D E T Q C Y Q V T C Y L T W S P C S S C A W

GGAGCTGGTTGACTTCATCAAGGCTCACGACCATCTGAACCTGGGCATCTTCGCCTCCCGCCTGTACTACCACTGGT

E L V D F I K A H D H L N L G I F A S R L Y Y H W

G C

GCAAGCCCCAGCAGAAGGGGCTGCGGCTTCTGTGTGGATCCCAGGTCCCGGTGGAGGTCATGGGCTTCCCAAgtagg

C K P Q Q K G L R L L C G S Q V P V E V M G F P

D

139

3' -GAAACGTCAATATTCTCACGTTTGG-5'

aaagaggctttgcagttataagagtgcaaaccggggggcacaggcttggca

Assay is based upon the HpyAV restriction enzyme (recognition sequences; [CCTTC]N6 and N6[GAAGG]). Underlined letters in the sequence above show the location of the recognition sites.

Expected sizes for the D121K genotyping assay.

| Uncut | 121D/121D | 121D/121K | 121K/121K |
|-------|-----------|-----------|-----------|
| 441   | 322       | 322       |           |
|       |           | 220       | 220       |
|       | 119       | 119       | 119       |
|       |           | 102       | 102       |

**Supplementary Figure 5. APOBEC3H E140K genotyping assay**

Forward primer: 72.0°C GCATCTTCGCCTCCCGCCTGT

Reverse primer: 70.7°C CCCTGCCAAGCCTGTGCC

exon 3 (second coding exon)

GCATCTTCGCCTCCCGCCTGT

GACTTCATCAAGGCTCACGACCATCTGAACCTGGGCATCTTCGCCTCCCGCCTGTACTACCACTGGTGCAAGCCCCA  
 D F I K A H D H L N L G I F A S R L Y Y H W C K P Q  
 94

A

GCAGAAGGGGCTGCGGCTTCTGTGTGGATCCCAGGTCCCGGTGGAGGTCATGGGCTTCCCAGgtaggaaagaggctt  
 Q K G L R L L C G S Q V P V E V M G F P E  
 120 K

140

3' -CCCGTGTCCGAACCGTCCC-5'

tgcagttataagagtgcaaacccccggggggcacaggccttggcaggggctggggggttggggggttggggggttggaggag

Assay is based on the BstNI restriction enzyme (recognition sequence = CCWGG, where W represents A or T).

Expected sizes for the E140K genotyping assay.

| Uncut | 140K/140K | 140K/140E | 140E/140E |
|-------|-----------|-----------|-----------|
| 166   |           |           |           |
|       | 90        | 90        |           |
|       | 76        | 76        | 76        |
|       |           | 62        | 62        |
|       |           | 28        | 28        |

Assay notes: The amplified region is GC-rich (60.9%), so PCRs are conducted with 1 M betaine included. The primers have relatively high Tm's, so annealing an extension can be done at the same temperature (that is, 72°C).

**Supplemental Figure 6. APOBEC3H E178D genotyping assay.**

Primers for the assay (melting temperature followed by the sequence)

Forward primer: 58.1°C CAAGAGCTCCTGGCACTG

Reverse primer: 61.0°C CTGGTGCGAGAGGAGAACAC

CAAGAGCTCCTGGCACTG exon 4  
caagagctcctggcactgcagctgctgcccctggggcctggctgggtttccctcttccctctcagAGTTTGCTGACTG  
E F A D C  
140

CTGGGAAAACCTTTGTGGACCACGAGAAACCGCTTTCCTTCAACCCCTATAAGATGTTAGAGGAGCTAGATAAAAACA  
W E N F V D H E K P L S F N P Y K M L E E L D K N

C

GTCGAGCCATAAAGCGACGGCTTGAGAGGATAAAGGTGAGGCACTGTCCTGCCTGCTGCCCCGACCTCCTCACCGC  
S R A I K R R L E R I K  
D 181

ctgccgcagccccataccagtcacacctctgccactgcccttaccctacctttttttctttttctttttctttttct  
tttttgagacagggctcactctgtcaccagcaggagggcagtggtgtgatctcggctcagtgcaacctctgcct  
cccgggttcaagtgattctcctgcctcagcctcccagtagctgggagtagcagggcactcgccaccatgccagctaa  
tttttgatttttagtagagatggggtttcaccatggttcccagggctggtccttagaactcttggcctcaagtgacct  
gccttccttggcctcccaaagtgctgggattacaggtgtgagccaccgtgccccgccccactacctgtttcttttt

CACAAGAGGAGAGCGTGGTC-5'  
gtgttctcctctcgcaccaggggctccttc

Assay is based upon the SmlI restriction enzyme (recognition sequence; CTYRAG).

Expected sizes for the D178K genotyping assay.

| Uncut | 178D/178D | 178D/178E | 178E/178E |
|-------|-----------|-----------|-----------|
| 636   | 530       | 530       |           |
|       | 353       | 353       |           |
|       |           | 177       | 177       |
|       | 106       | 106       | 106       |

Assay note: Optimal digestion temperature for SmlI is 55°C.
